# Supplementary material for: Cognitive Bias Under Adverse and Rewarding Conditions: A Systematic Review of Rodent Studies
Source: Front Behav Neurosci. 2020 Feb 12;14:14. doi: 10.3389/fnbeh.2020.00014 (PMC7029709; doi:10.3389/fnbeh.2020.00014)
Supplement: Table S2 — Characteristics of included studies. n.a., not applicable; ?, unsure. [file Table_2.xlsx]

## Sheet: Study characteristics
	reference	comparison	species	strain	genetic background	trait	gender	mass (start exp)	n (experiment)	n (control)	age (start exp)	frequency test	cue	ambiguous cue	control	behavioural task	intervention	frequency intervention	dose intervention
	Bethell EJ, Koyama NF (2015)	A	hamster	?	wildtype	n.a.	male	?	? 24	?	8 weeks	3 after, 3 before enrichment	sucroce, QHCl	three drinkers (near sugar, QHCl, in the middle)	empty drinkers sucrose, QHCL	spatial: cues are located in different places in arena	housing enriched, then remove	n.a.	n.a.
	Bethell EJ, Koyama NF (2015)	B	hamster	?	wildtype	n.a.	male	?	?	?	8 weeks	3 after, 3 before enrichment	sucroce, QHCl	three drinkers (near sugar, QHCl, in the middle)	empty drinkers sucrose, QHCL	spatial: cues are located in different places in arena	remove enrichment, then enrich	n.a.	n.a.
	Drozd et al. (2017)	A	rats	Sprague Dawley	wildtype	positivity-biased	male	?	17	n.a.	?	10 in 3 day intervals	2kHz (sucrose), 9kHz (electric shock) at 75 dB	5kHz (75 dB)	n.a.	auditory: tone associated with stimuli	n.a.	n.a.	n.a.
	Drozd et al. (2017)	B	rats	Sprague Dawley	wildtype	negativity-biased	male	?	28	n.a.	?	10 in 3 day intervals	2kHz (sucrose), 9kHz (electric shock) at 75 dB	5kHz (75 dB)	n.a.	auditory: tone associated with stimuli	n.a.	n.a.	n.a.
	Drozd et al. (2018)	A	rats	Sprague Dawley	wildtype	positivity-biased	male	348-527g	? 12	?	?	10 in 3 day intervals	2kHz (sucrose), 9kHz (electric shock) at 75 dB	5kHz (75 dB)	saline	auditory: tone associated with stimuli	agomelatine	once	n.a.
	Drozd et al. (2018)	B	rats	Sprague Dawley	wildtype	negativity-biased	male	348-527g	?18	?	?	10 in 3 day intervals	2kHz (sucrose), 9kHz (electric shock) at 75 dB	5kHz (75 dB)	saline	auditory: tone associated with stimuli	agomelatine	once	n.a.
	Drozd et al. (2018)	C	rats	Sprague Dawley	wildtype	positivity-biased	male	348-527g	? 12	?	?	10 in 3 day intervals	2kHz (sucrose), 9kHz (electric shock) at 75 dB	5kHz (75 dB)	saline	auditory: tone associated with stimuli	escitalopram	once	n.a.
	Drozd et al. (2018)	D	rats	Sprague Dawley	wildtype	negativity-biased	male	348-527g	? 18	?	?	10 in 3 day intervals	2kHz (sucrose), 9kHz (electric shock) at 75 dB	5kHz (75 dB)	saline	auditory: tone associated with stimuli	escitalopram	once	n.a.
	Drozd et al. (2018)	E	rats	Sprague Dawley	wildtype	positivity-biased	male	348-527g	?12	?	?	10 in 3 day intervals	2kHz (sucrose), 9kHz (electric shock) at 75 dB	5kHz (75 dB)	saline	auditory: tone associated with stimuli	clomipramine	once	n.a.
	Drozd et al. (2018)	F	rats	Sprague Dawley	wildtype	negativity-biased	male	348-527g	? 18	?	?	10 in 3 day intervals	2kHz (sucrose), 9kHz (electric shock) at 75 dB	5kHz (75 dB)	saline	auditory: tone associated with stimuli	clomipramine	once	n.a.
	Drozd et al. (2018)	G	rats	Sprague Dawley	wildtype	positivity-biased	male	348-527g	? 12	?	?	10 in 3 day intervals	2kHz (sucrose), 9kHz (electric shock) at 75 dB	5kHz (75 dB)	saline	auditory: tone associated with stimuli	mitrazapine	once	n.a.
	Drozd et al. (2018)	H	rats	Sprague Dawley	wildtype	negativity-biased	male	348-527g	?18	?	?	10 in 3 day intervals	2kHz (sucrose), 9kHz (electric shock) at 75 dB	5kHz (75 dB)	saline	auditory: tone associated with stimuli	mitrazapine	once	n.a.
	Drozd et al. (2018)	I	rats	Sprague Dawley	wildtype	positivity-biased	male	348-527g	? 13	?	?	10 in 3 day intervals	2kHz (sucrose), 9kHz (electric shock) at 75 dB	5kHz (75 dB)	saline	auditory: tone associated with stimuli	venlafaxine	once	n.a.
	Drozd et al. (2018)	J	rats	Sprague Dawley	wildtype	negativity-biased	male	348-527g	? 6	?	?	10 in 3 day intervals	2kHz (sucrose), 9kHz (electric shock) at 75 dB	5kHz (75 dB)	saline	auditory: tone associated with stimuli	venlafaxine	once	n.a.
	Enkel et al. (2010)	A	rats	Sprague Dawley	wildtype	congenitally helpless	male	?	4	6	?	? 6 consecutive days	2kHz (sweetened condensed milk ), 9kHz (electric shock) at 75 dB	3kHz (75dB), 5kHz (68dB), 7kHz (65dB)	non-helpless rats	auditory: tone associated with stimuli	n.a.	n.a.	n.a.
	Enkel et al. (2010)	B	rats	Sprague Dawley	wildtype	n.a.	male	?	12	?	?	2	2kHz (sweetened condensed milk ), 9kHz (electric shock) at 75 dB	3kHz (75dB), 5kHz (68dB), 7kHz (65dB)	saline	auditory: tone associated with stimuli	reboxetine + corticosterone	once	0.5mg/kg + 15mg/kg
	Ginsburg BC, Lamb RJ (2012)	A	rats	Lewis rats	wildtype	n.a.	male	280-320g	5	5	?	? 1 , 2 (control)	16kHz (sucrose FR150, ethanol FR5), 8kHz (sucrose FR5 ,ethanol FR5) at 80dB	6, 8, 10, 12, 14, 16, 18 kHz (80dB)	alternating 16, 8 kHz	auditory: tone associated with stimuli	n.a.	n.a.	n.a.
	Ginsburg BC, Lamb RJ (2012)	B	rats	Lewis rats	wildtype	n.a.	male	280-320g	4	5	?	? 1 , 2 (control)	16kHz (sucrose FR150, ethanol FR5), 8kHz (sucrose FR5 ,ethanol FR5) at 80dB	6, 8, 10, 12, 14, 16, 18 kHz (80dB)	alternating 16, 8 kHz	auditory: tone associated with stimuli	n.a.	n.a.	n.a.
	Ginsburg BC, Lamb RJ (2012)	C	rats	Lewis rats	wildtype	n.a.	male	280-320g	5	5	?	? 1 , 2 (control)	16kHz (sucrose FR150, ethanol FR5), 8kHz (sucrose FR5 ,ethanol FR5) at 80dB	6, 8, 10, 12, 14, 16, 18 kHz (80dB)	alternating 16, 8 kHz	auditory: tone associated with stimuli	n.a.	n.a.	n.a.
	Ginsburg BC, Lamb RJ (2012)	D	rats	Lewis rats	wildtype	n.a.	male	280-320g	5	5	?	? 1 , 2 (control)	16kHz (sucrose FR75 , ethanol FR5), 8kHz (sucrose FR25, ethanol FR5) at 80dB	6, 8, 10, 12, 14, 16, 18 kHz (80dB)	alternating 16, 8 kHz	auditory: tone associated with stimuli	n.a.	n.a.	n.a.
	Ginsburg BC, Lamb RJ (2012)	E	rats	Lewis rats	wildtype	n.a.	male	280-320g	4	5	?	? 1 , 2 (control)	16kHz (sucrose FR75 , ethanol FR5), 8kHz (sucrose FR25, ethanol FR5) at 80dB	6, 8, 10, 12, 14, 16, 18 kHz (80dB)	alternating 16, 8 kHz	auditory: tone associated with stimuli	n.a.	n.a.	n.a.
	Hales CA et al. (2017)	A	rats	Lister Hooded	wildtype	n.a.	male	400- 500g	9	?	?	2 (2 days)	2kHz at 75 (4 x sugar pellet), 8kHz 64 dB (1 x sugar pellet)	4999Hz, 5001Hz (70dB)	saline	auditory: tone associated with stimuli	flouxetine	once	0.3 mg/kg
	Hales CA et al. (2017)	A	rats	Lister Hooded	wildtype	n.a.	male	400- 500g	9	?	?	2 (2 days)	2kHz at 75 (4 x sugar pellet), 8kHz 64 dB (1 x sugar pellet)	4999Hz, 5001Hz (70dB)	saline	auditory: tone associated with stimuli	flouxetine	once	1.0 mg/kg
	Hales CA et al. (2017)	B	rats	Lister Hooded	wildtype	n.a.	male	400- 500g	9	?	?	2 (2 days)	2kHz at 75 (4 x sugar pellet), 8kHz 64 dB (1 x sugar pellet)	4999Hz, 5001Hz (70dB)	saline	auditory: tone associated with stimuli	reboxetine	once	0.3 mg/kg
	Hales CA et al. (2017)	C	rats	Lister Hooded	wildtype	n.a.	male	400- 500g	9	?	?	2 (2 days)	2kHz at 75 (4 x sugar pellet), 8kHz 64 dB (1 x sugar pellet)	4999Hz, 5001Hz (70dB)	saline	auditory: tone associated with stimuli	reboxetine	once	1.0 mg/kg
	Hales CA et al. (2017)	D	rats	Lister Hooded	wildtype	n.a.	male	400- 500g	9	?	?	2 (2 days)	2kHz at 75 (4 x sugar pellet), 8kHz 64 dB (1 x sugar pellet)	4999Hz, 5001Hz (70dB)	saline	auditory: tone associated with stimuli	venlafaxine	once	1.0 mg/kg
	Hales CA et al. (2017)	E	rats	Lister Hooded	wildtype	n.a.	male	400- 500g	9	?	?	2 (2 days)	2kHz at 75 (4 x sugar pellet), 8kHz 64 dB (1 x sugar pellet)	4999Hz, 5001Hz (70dB)	saline	auditory: tone associated with stimuli	venlafaxine	once	3.0 mg/kg
	Hales CA et al. (2017)	F	rats	Lister Hooded	wildtype	n.a.	male	400- 500g	13	?	?	2 (2 days)	2kHz at 75 (4 x sugar pellet), 8kHz 64 dB (1 x sugar pellet)	4999Hz, 5001Hz (70dB)	saline	auditory: tone associated with stimuli	ketamine	once	0.3 mg/kg
	Hales CA et al. (2017)	G	rats	Lister Hooded	wildtype	n.a.	male	400- 500g	13	?	?	2 (2 days)	2kHz at 75 (4 x sugar pellet), 8kHz 64 dB (1 x sugar pellet)	4999Hz, 5001Hz (70dB)	saline	auditory: tone associated with stimuli	ketamine	once	1.0 mg/kg
	Hales CA et al. (2017)	H	rats	Lister Hooded	wildtype	n.a.	male	400- 500g	13	?	?	2 (2 days)	2kHz at 75 (4 x sugar pellet), 8kHz 64 dB (1 x sugar pellet)	4999Hz, 5001Hz (70dB)	saline	auditory: tone associated with stimuli	ketamine	once	3.0 mg/kg
	Hales CA et al. (2017)	I	rats	Lister Hooded	wildtype	n.a.	male	400- 500g	15	?	?	2 (2 days)	2kHz at 75 (4 x sugar pellet), 8kHz 64 dB (1 x sugar pellet)	4999Hz, 5001Hz (70dB)	saline	auditory: tone associated with stimuli	ketamine	once	1.0 mg/kg
	Hales CA et al. (2017)	J	rats	Lister Hooded	wildtype	n.a.	male	400- 500g	16	?	?	2 (2 days)	2kHz at 75 (4 x sugar pellet), 8kHz 64 dB (1 x sugar pellet)	4999Hz, 5001Hz (70dB)	saline	auditory: tone associated with stimuli	pencyclidine	once	0.3 mg/kg
	Hales CA et al. (2017)	K	rats	Lister Hooded	wildtype	n.a.	male	400- 500g	16	?	?	2 (2 days)	2kHz at 75 (4 x sugar pellet), 8kHz 64 dB (1 x sugar pellet)	4999Hz, 5001Hz (70dB)	saline	auditory: tone associated with stimuli	pencyclidine	once	1.0 mg/kg
	Hales CA et al. (2017)	L	rats	Lister Hooded	wildtype	n.a.	male	400- 500g	16	?	?	6 (2 per week)	2kHz at 75 (4 x sugar pellet), 8kHz 64 dB (1 x sugar pellet)	4999Hz, 5001Hz (70dB)	saline	auditory: tone associated with stimuli	pencyclidine	once	3.0 mg/kg
	Hales CA et al. (2017)	M	rats	Lister Hooded	wildtype	n.a.	male	400- 500g	9	8	?	2 (2 days)	2kHz at 75 (4 x sugar pellet), 8kHz 64 dB (1 x sugar pellet)	4999Hz, 5001Hz (70dB)	saline	auditory: tone associated with stimuli	flouxetine	c	1.0 mg/kg
	Hales CA et al. (2017)	N	rats	Lister Hooded	wildtype	n.a.	male	400- 500g	15	?	?	2 (2 days)	2kHz at 75 (4 x sugar pellet), 8kHz 64 dB (1 x sugar pellet)	4999Hz, 5001Hz (70dB)	saline	auditory: tone associated with stimuli	amphetamine	once	0.1 mg/kg
	Hales CA et al. (2017)	O	rats	Lister Hooded	wildtype	n.a.	male	400- 500g	15	?	?	2 (2 days)	2kHz at 75 (4 x sugar pellet), 8kHz 64 dB (1 x sugar pellet)	4999Hz, 5001Hz (70dB)	saline	auditory: tone associated with stimuli	amphetamine	once	0.3 mg/kg
	Hales CA et al. (2017)	Q	rats	Lister Hooded	wildtype	n.a.	male	400- 500g	17	?	?	2 (2 days)	2kHz at 75 (4 x sugar pellet), 8kHz 64 dB (1 x sugar pellet)	4999Hz, 5001Hz (70dB)	saline	auditory: tone associated with stimuli	cocaine	once	0.3 mg/kg
	Hales CA et al. (2017)	R	rats	Lister Hooded	wildtype	n.a.	male	400- 500g	17	?	?	2 (2 days)	2kHz at 75 (4 x sugar pellet), 8kHz 64 dB (1 x sugar pellet)	4999Hz, 5001Hz (70dB)	saline	auditory: tone associated with stimuli	cocaine	once	1.0 mg/kg
	Hales CA et al. (2017)	S	rats	Lister Hooded	wildtype	n.a.	male	400- 500g	17	?	?	2 (2 days)	2kHz at 75 (4 x sugar pellet), 8kHz 64 dB (1 x sugar pellet)	4999Hz, 5001Hz (70dB)	saline	auditory: tone associated with stimuli	cocaine	once	3.0 mg/kg
	Kloke et al. (2014)	A	mice	C57BL/6J	(-/-) 5-HTT KO	n.a.	female	?	6	n.a.	?	1	2 locations: access home cage, location with air-puff	location midway of the 2 locations	n.a.	spatial: maze with multiple arms	n.a.	n.a.	n.a.
	Kloke et al. (2014)	B	mice	C57BL/6J	(-/+) 5-HTT KO	n.a.	female	?	9	n.a.	?	1	2 locations: access home cage, location with air-puff	location midway of the 2 locations	n.a.	spatial: maze with multiple arms	n.a.	n.a.	n.a.
	Kloke et al. (2014)	C	mice	C57BL/6J	wildtype	n.a.	female	?	5	n.a.	?	1	2 locations: access home cage, location with air-puff	location midway of the 2 locations	n.a.	spatial: maze with multiple arms	n.a.	n.a.	n.a.
	Kloke et al. (2014)	D	mice	C57BL/6J	wildtype	n.a.	female	?	10	n.a.	?	1	2 locations: access home cage, location with air-puff	location midway of the 2 locations	n.a.	spatial: maze with multiple arms	n.a.	n.a.	n.a.
	Kloke et al. (2014)	E	mice	C57BL/6J	wildtype	n.a.	female	?	7	n.a.	?	1	2 locations: access home cage, location with air-puff	location near air puff location	n.a.	spatial: maze with multiple arms	n.a.	n.a.	n.a.
	Kloke et al. (2014)	F	mice	C57BL/6J	wildtype	n.a.	female	?	11	n.a.	?	1	2 locations: access home cage, location with air-puff	location near home cage	n.a.	spatial: maze with multiple arms	n.a.	n.a.	n.a.
	Kloke et al. (2014)	G	mice	C57BL/6N	wildtype	positivity-biased	female	?	7	n.a.	?	1	2 locations: both shelter from illuminated apparatus	unfamiliar location located midway of the 2 locations	n.a.	spatial: maze with multiple arms	n.a.	n.a.	n.a.
	Kloke et al. (2014)	H	mice	C57BL/6N	wildtype	negativity-biased	female	?	7	n.a.	?	1	2 locations: both with air-puff	unfamiliar location located midway of the 2 locations	n.a.	spatial: maze with multiple arms	n.a.	n.a.	n.a.
	Papciak J et al. (2013)	A	rats	Sprague Dawley	wildtype	n.a.	male	?	16	16	?	4 before, 4 during defeat	2kHz (sucrose), 9kHz (electric shock) at 75 dB	5kHz (75 dB)	no social defeat	auditory: tone associated with stimuli	defeaded by Wistar rat (450-500g)	daily 3 weeks	1h
	Richter SH et al. (2012)	A	rats	Sprague Dawley	wildtype	congenitally helpless	?	550-700g	12	11	21 - 46 weeks	3 before enrichment	1 arm (half fruit loop), 1 arm (quinine-soaked fruit loop)	3 arms: near fruit loop, midway, near quinine fruit loop	non-helpless rats	spatial: maze with multiple arms	n.a.	n.a.	n.a.
	Richter SH et al. (2012)	B	rats	Sprague Dawley	wildtype	congenitally helpless	?	550-700g	6	6	22 - 46 weeks	3 before, 3 after enrichment	1 arm (half fruit loop), 1 arm (quinine-soaked fruit loop)	3 arms: near fruit loop, midway, near quinine fruit loop	standard housing (within subject)	spatial: maze with multiple arms	housing enriched	n.a.	n.a.
	Richter SH et al. (2012)	C	rats	Sprague Dawley	wildtype	non-helpless	?	550-700g	4	6	23 - 46 weeks	3 before, 3 after enrichment	1 arm (half fruit loop), 1 arm (quinine-soaked fruit loop)	3 arms: near fruit loop, midway, near quinine fruit loop	standard housing (within subject)	spatial: maze with multiple arms	housing enriched	n.a.	n.a.
	Rygula R et al. (2013)	A	rats	Sprague Dawley	wildtype	positivity-biased	male	?	11	n.a.	?	10 in 3 day intervals	2kHz (sucrose), 9kHz (electric shock) at 75 dB	5kHz (75 dB)	n.a.	auditory: tone associated with stimuli	n.a.	n.a.	n.a.
	Rygula R et al. (2013)	B	rats	Sprague Dawley	wildtype	negativity-biased	male	?	13	n.a.	?	10 in 3 day intervals	2kHz (sucrose), 9kHz (electric shock) at 75 dB	5kHz (75 dB)	n.a.	auditory: tone associated with stimuli	n.a.	n.a.	n.a.
	Rygula R et al. (2013)	C	rats	Sprague Dawley	wildtype	positivity-biased	male	?	6	5	?	? 4	2kHz (sucrose), 9kHz (electric shock) at 75 dB	5kHz (75 dB)	no stress	auditory: tone associated with stimuli	stress (restrain tube)	daily 3 weeks	1h
	Rygula R et al. (2013)	D	rats	Sprague Dawley	wildtype	negativity-biased	male	?	7	7	?	? 4	2kHz (sucrose), 9kHz (electric shock) at 75 dB	5kHz (75 dB)	no stress	auditory: tone associated with stimuli	stress (restrain tube)	daily 3 weeks	1h
	Rygula R, Popik P (2016)	A	rats	Sprague Dawley	wildtype	positivity-biased	male	?	17	n.a.	?	10 (1 week intervals)	2kHz (sucrose), 9kHz (electric shock) at 75 dB	5kHz (75 dB)	n.a.	auditory: tone associated with stimuli	probablistic reversal learning (correct: 80% sucrose, 20% electric shock, incorrect: 80% shock, 20% sucrose)	10 times, 10 days	n.a.
	Rygula R, Popik P (2016)	B	rats	Sprague Dawley	wildtype	negativity-biased	male	?	12	n.a.	?	10 (1 week intervals)	2kHz (sucrose), 9kHz (electric shock) at 75 dB	5kHz (75 dB)	n.a.	auditory: tone associated with stimuli	probablistic reversal learning (correct: 80% sucrose, 20% electric shock, incorrect: 80% shock, 20% sucrose)	10 times, 10 days	n.a.
	Anderson MH et al. (2013)	A	rats	Lister Hooded	wild-type	n.a.	male	568 +/- 46g	19	?	12 weeks	4 (2 weeks)	2kHz 77dB (1 sugar pellet), 8kHz 66dB (electric shock)	4999Hz, 5001Hz (70dB)	saline	auditory: tone associated with stimuli	diazepam	once	0.3 mg/kg
	Anderson MH et al. (2013)	B	rats	Lister Hooded	wild-type	n.a.	male	569 +/- 46g	19	?	12 weeks	4 (2 weeks)	2kHz 77dB (1 sugar pellet), 8kHz 66dB (electric shock)	4999Hz, 5001Hz (70dB)	saline	auditory: tone associated with stimuli	diazepam	once	1.0 mg/kg
	Anderson MH et al. (2013)	C	rats	Lister Hooded	wild-type	n.a.	male	570 +/- 46g	18	?	12 weeks	4 (2 weeks)	2kHz 77dB (1 sugar pellet), 8kHz 66dB (electric shock)	4999Hz, 5001Hz (70dB), 4kHz (72dB), 6kHz (68dB)	saline	auditory: tone associated with stimuli	reboxetine	once	0.3 mg/kg
	Anderson MH et al. (2013)	D	rats	Lister Hooded	wild-type	n.a.	male	571 +/- 46g	18	?	12 weeks	4 (2 weeks)	2kHz 77dB (1 sugar pellet), 8kHz 66dB (electric shock)	4999Hz, 5001Hz (70dB), 4kHz (72dB), 6kHz (68dB)	saline	auditory: tone associated with stimuli	reboxetine	once	1.0 mg/kg
	Anderson MH et al. (2013)	E	rats	Lister Hooded	wild-type	n.a.	male	572 +/- 46g	18	?	12 weeks	4 (2 weeks)	2kHz 77dB (1 sugar pellet), 8kHz 66dB (electric shock)	4999Hz, 5001Hz (70dB), 4kHz (72dB), 6kHz (68dB)	saline	auditory: tone associated with stimuli	reboxitine	once	3.0 mg/kg
	Anderson MH et al. (2013)	F	rats	Lister Hooded	wild-type	n.a.	male	573 +/- 46g	17	?	12 weeks	4 (2 weeks)	2kHz 77dB (1 sugar pellet), 8kHz 66dB (electric shock)	4999Hz, 5001Hz (70dB), 4kHz (72dB), 6kHz (68dB)	saline	auditory: tone associated with stimuli	fluoxetine	once	0.1 mg/kg
	Anderson MH et al. (2013)	G	rats	Lister Hooded	wild-type	n.a.	male	574 +/- 46g	17	?	12 weeks	4 (2 weeks)	2kHz 77dB (1 sugar pellet), 8kHz 66dB (electric shock)	4999Hz, 5001Hz (70dB), 4kHz (72dB), 6kHz (68dB)	saline	auditory: tone associated with stimuli	fluoxetine	once	0.3 mg/kg
	Anderson MH et al. (2013)	H	rats	Lister Hooded	wild-type	n.a.	male	575 +/- 46g	17	?	12 weeks	4 (2 weeks)	2kHz 77dB (1 sugar pellet), 8kHz 66dB (electric shock)	4999Hz, 5001Hz (70dB), 4kHz (72dB), 6kHz (68dB)	saline	auditory: tone associated with stimuli	fluoxetine	once	1.0 mg/kg
	Anderson MH et al. (2013)	I	rats	Lister Hooded	wild-type	n.a.	male	575 +/- 46g	8	7	12 weeks	2 per week (6 weeks)	2kHz 77dB (1 sugar pellet), 8kHz 66dB (electric shock)	4999Hz, 5001Hz (70dB), 4kHz (72dB), 6kHz (68dB)	saline	auditory: tone associated with stimuli	fluoxetine (counterbalanced)	daily 3 weeks	1.0 mg/kg
	Brydges MN et al (2012)	A	rats	Lister Hooded	wild-type	n.a.	female	?	6	6	99 days +/- 12.7 sd	5 (5 days)	tunnel (coarse sandpaper): left bowl (coriander scent, black (chocolate)), tunnel(fine sandpaper): right bowl (cinnamon scent, white (Cheerio))	tunnel (intermediate texture sandpaper)	no sress	tactile, olfactory : entry tunnel of different sand texture, bowls different odor	swimm stress, restrain tube, electric footshock	postnatal on 3 days	10min, 3x30min, 3min
	Brydges MN et al (2012)	B	rats	Lister Hooded	wild-type	n.a.	male	?	6	6	99 days +/- 12.7 sd	5 (5 days)	tunnel (coarse sandpaper): left bowl (coriander scent, black (chocolate)), tunnel(fine sandpaper): right bowl (cinnamon scent, white (Cheerio))	tunnel (intermediate texture sandpaper)	no stress	tactile, olfactory : entry tunnel of different sand texture, bowls different odor	swimm stress, restrain tube, electric footshock	postnatal on 3 days	10min, 3x30min, 3min
	Brydges MN et al (2011)	A	rats	Sprague Dawley	wild-type	n.a.	male	?	?6	?6	6 months	5 before, 4 after enrichment	tunnel (coarse sandpaper): left bowl (coriander scent, black (chocolate)), tunnel(fine sandpaper): right bowl (cinnamon scent, white (Cheerio))	tunnel (intermediate texture sandpaper)	standard housing	tactile, olfactory : entry tunnel of different sand texture, bowls different odor	enriched housing	n.a.	n.a.
	Burman OHP et al. (2008)	A	rats	Lister Hooded	wild-type	n.a.	male	?	12	11	6 months	3 (3 days)	pot (food pellets accessible), pot (food pellet inaccessible)	3 pots evenly located between reference pots (inaccessible pellets)	unenriched housing (remove items)	spatial: arena with pots	enriched housing	n.a.	n.a.
	Burman OHP et al. (2009)	A	rats	Lister Hooded	wild-type	n.a.	male	?	5	6	?	3 (3 days), 2 replicates	radial maze with arms, illumination at centre : 1 arm (4 food pellets), 1 arm (1 quinone soaked food pellet)	3 arms (no pellets) between 2 arms	training (60Watt), test (10Watt)	spatial, visual: locations with different light intensities	training and test (60Watt)	n.a.	n.a.
	Burman OHP et al. (2009)	B	rats	Lister Hooded	wild-type	n.a.	male	?	6	6	?	3 (3 days), 2 replicates	radial maze with arms, illumination at centre : 1 arm (4 food pellets), 1 arm (1 quinone soaked food pellet)	3 arms (no pellets) between 2 arms	training (10Watt), test (60Watt)	spatial, visual: locations with different light intensities	training and test (10Watt)	n.a.	n.a.
	Chaby LE et al. (2013)	A	rats	Long-Evans	wild-type	n.a.	male	?	6	total=8,6	28 days	5 after stress exposure	tunnel(coarse sandpaper): black, left bowl (1 Cheerio)), tunnel(fine sandpaper): white,right bowl (3 Cheerios))	tunnel (intermediate texture sandpaper)	?	tactile, olfactory : entry tunnel of different sand texture, bowls different odor	physical, social stress (randomly)	adolescent stress (30 -70days age)	smaller cage (4h), damp bedding(6h),cage tilt(6h), isolation(1.5h),crowding(4h)foreign bedding(12h)
	Harding EJ et al. (2004)	A	rats	Lister Hooded	wild-type	n.a.	male	?	5	4	?	10 after housing condition	2kHz (food pellet), 4kHz (70dB white noise)	2.5, 3, 3.5 kHz	predictable housing	auditory: tone associated with stimuli	unpredictable housing (intruder, unfamiliar cage, bedding damped,light dark cycle reversed)	n.a.	n.a.
	Krakenberg V et al. (2019)	A	mice	C57BL76J	wild-type	n.a.	male	?	6	n.a.	111 days	5 (5days)	bottom bar at screen (touch field left/ right: 4uL/ 12uL sweet condensed milk), top bar at screen (touch field left/right 4uL SCM /light-on)	3 bars: height near top, bottom bar, midway	n.a.	visual: cues associated with stimuli	n.a.	n.a.	n.a.
	Krakenberg V et al. (2019)	B	mice	C57BL76J	wild-type	n.a.	male	?	9	n.a.	68 +/- 8 days	5 (5days)	50cm tunnel, 10cm tunnel connecting goalbox (large almond, small amond on one side) counterbalanced	20, 30, 40cm tunnels (no almond)	n.a.	spatial: arena with pots	n.a.	n.a.	n.a.
	Novak J et al.(2015)	A	mice	CB7BL/6	wild-type	n.a.	female	?	12	?	?	3 (3 days)	1 compartment: floor, pot covered with coarse sandpaper (1 pot: almond flake, 2.pot: oat flake), 2 compartment fine sandpaper (1.pot: no reward, 2.pot: oat flake)	? compartment with intermediate sandpaper	no chronic stress	tactile: arena with different texture	unpredictable chronic stress	3 weeks	wet bedding, lights on, plusing light, tilted cages
	Novak J et al.(2015)	B	mice	CD-1	wild-type	n.a.	female	?	14	?	?	3 (3 days)	1 compartment: floor, pot covered with coarse sandpaper (1 pot: almond flake, 2.pot: oat flake), 2 compartment fine sandpaper (1.pot: no reward, 2.pot: oat flake)	? compartment with intermediate sandpaper	no chronic stress	tactile: arena with different texture	unpredictable chronic stress	3 weeks	wet bedding, lights on, plusing light, tilted cages
