# Supplementary material for: Cognitive Bias Under Adverse and Rewarding Conditions: A Systematic Review of Rodent Studies
Source: Front Behav Neurosci. 2020 Feb 12;14:14. doi: 10.3389/fnbeh.2020.00014 (PMC7029709; doi:10.3389/fnbeh.2020.00014)
Supplement: Table S3 — Risk of bias assessment. [file Table_3.xlsx]

## Sheet: Blad1
reference	study objective	main outcomes	rodent characteristics	experimental task	outcomes valid, reliable	confounders described and controlled	statistical test/power/pHacking	main findings	dropouts described
Bethell EJ, Koyama NF (2015)	yes	yes	unsure	yes	unsure	yes	yes	yes	yes
Drozd et al. (2017)	yes	yes	unsure	yes	unsure	yes	unsure	yes	yes
Drozd et al. (2018)	yes	unsure	unsure	unsure	unsure	yes	unsure	yes	insufficient
Enkel et al. (2010)	yes	yes	unsure	yes	unsure	yes	unsure	yes	unsure
Ginsburg BC, Lamb RJ (2012)	yes	yes	unsure	yes	yes	yes	yes	yes	unsure
Hales CA et al. (2017)	yes	yes	unsure	yes	unsure	yes	unsure	yes	yes
Kloke V et al. (2014)	yes	yes	unsure	yes	yes	yes	yes	yes	yes
Papciak J et al. (2013)	yes	yes	unsure	yes	unsure	yes	unsure	yes	yes
Richter SH et al. (2012)	yes	yes	unsure	yes	yes	yes	yes	yes	yes
Rygula R et al. (2013)	yes	yes	unsure	yes	yes	yes	yes	yes	yes
Rygula R, Popik P (2016)	yes	yes	unsure	yes	yes	yes	yes	yes	yes
Anderson MH et al. (2013)	yes	yes	yes	yes	unsure	yes	unsure	yes	unsure
Brydges MN et al (2012)	yes	yes	unsure	yes	unsure	yes	yes	yes	yes
Brydges MN et al (2010)	yes	yes	unsure	yes	unsure	yes	yes	yes	unsure
Burman OHP et al. (2008)	yes	yes	unsure	yes	unsure	insufficient	unsure	yes	yes
Burman OHP et al. (2009)	yes	yes	unsure	yes	unsure	insufficient	yes	yes	yes
Chaby LE et al. (2013)	yes	yes	unsure	yes	yes	yes	yes	yes	yes
Harding EJ et al. (2004)	yes	yes	unsure	yes	unsure	insufficient	unsure	yes	unsure
Krakenberg V et al. (2019)	yes	yes	yes	yes	yes	yes	yes	yes	yes
Novak J et al.(2015)	yes	yes	unsure	unsure	unsure	yes	yes	yes	unsure
	count					percentage
	insufficient	yes	unsure	n studies		insufficient	yes	unsure
1. study objective	0	20	0	20		0	100	0
2. main outcomes	0	19	1			0	95	5
3. rodent characteristics	0	2	18			0	10	90
4. experimental task	0	18	2			0	90	10
5. outcomes valid, reliable	0	7	13			0	35	65
6. confounders described and controlled	3	17	0			15	85	0
7. statistics (p-Hacking, distribution, test)	0	12	8			0	60	40
8. power-analysis provided	19	1	0			95	5	0
9. main findings	0	20	0			0	100	0
10. dropouts descibed	1	13	6			5	65	30
excluded in comparison studies
